# Supplementary material for: Pharmacokinetics of Novel Dopamine Transporter Inhibitor CE-123 and Modafinil with a Focus on Central Nervous System Distribution
Source: MDPI journal article supplement (doi:10.3390/ijms242316956), 2023-11-29
Supplement: s1 [file s1]

*Supplementary Material*

# **Pharmacokinetics of Novel Dopamine Transporter Inhibitor, CE-123 and Modafinil with a Focus on Central Nervous System Distribution**

**Iva Spreitzer <sup>1,2</sup>, Josefin Keife <sup>3</sup>, Tobias Strasser <sup>1</sup>, Predrag Kalaba <sup>1</sup>, Jana Lubec <sup>4</sup>, Winfried Neuhaus <sup>5,6</sup>, Gert Lubec <sup>4</sup>, Thierry Langer <sup>1</sup>, Judith Wackerlig <sup>1,\*</sup> and Irena Loryan <sup>3,\*</sup>**

<sup>1</sup> Department of Pharmaceutical Sciences, University of Vienna, 1090 Vienna, Austria

<sup>2</sup> Vienna Doctoral School of Pharmaceutical, Nutritional and Sport Sciences, University of Vienna, 1090, Vienna, Austria.

<sup>3</sup> Translational Pharmacokinetics/Pharmacodynamics Group, Department of Pharmacy, Uppsala University, Uppsala, 75123, Sweden

<sup>4</sup> Programme for Proteomics, Paracelsus Medical University, 5020 Salzburg, Austria

<sup>5</sup> Competence Unit Molecular Diagnostics, Center Health and Bioresources, AIT Austrian Institute of Technology GmbH, Vienna, Austria

<sup>6</sup> Department of Medicine, Faculty of Medicine and Dentistry, Danube Private University, 3500 Krems, Austria

\* Correspondence: JW [judith.wackerlig@univie.ac.at](mailto:judith.wackerlig@univie.ac.at); IL [irena.loryan@farmaci.uu.se](mailto:irena.loryan@farmaci.uu.se)

## Table of content

|                                                                                                                                                                                                                                                                                                                                                                                                                                      |    |
|--------------------------------------------------------------------------------------------------------------------------------------------------------------------------------------------------------------------------------------------------------------------------------------------------------------------------------------------------------------------------------------------------------------------------------------|----|
| <b>Figure S1.</b> Plasma stability of <i>R</i> -modafinil after 4-h incubation in rat plasma and rat plasma containing 10 % DMF as an inhibitor (n=3, mean $\pm$ SD).                                                                                                                                                                                                                                                                | 3  |
| <b>Table S1.</b> Assessment <i>R</i> -modafinil's (50, 500 and 1000 ng/mL) accuracy in presence of modafinil acid (1000 ng/mL) (n=3, mean $\pm$ SD).                                                                                                                                                                                                                                                                                 | 3  |
| <b>Figure S2. A:</b> Extracted ion chromatogram of <i>S</i> -CE-123 metabolite M1 at <i>m/z</i> 330.0624 after 60 minutes of incubation of <i>S</i> -CE-123 (50 $\mu$ M) with human liver microsomes. <b>B:</b> High resolution mass specter of <i>S</i> -CE-123 metabolite M1.                                                                                                                                                      | 4  |
| <b>Table S2.</b> Total concentration of <i>S</i> -CE-123 and <i>R</i> -modafinil in rat plasma, brain, CSF, liver, kidney, and spinal cord 4 hours intravenous constant infusion of 20 mg/kg each (n=3, except CSF n=2 for <i>S</i> -CE-123 and n=1 for <i>R</i> -modafinil).                                                                                                                                                        | 5  |
| <b>Figure S3.</b> Relative exposure of M1, metabolite of <i>S</i> -CE-123 and modafinil acid (MA) and modafinil sulfone (MS), metabolites of <i>R</i> -modafinil in rat plasma and CSF and vital organs after 4-hour intravenous constant infusion of 20 mg/kg of <i>S</i> -CE-123 and <i>R</i> -modafinil (n=3, except CSF n=2 for <i>S</i> -CE-123 and n=1 for <i>R</i> -modafinil, mean $\pm$ SD)                                 | 6  |
| <b>Figure S4.</b> Extracted ion chromatograms of <i>R</i> -modafinil (peak 1) and modafinil sulfone (peak 2) at <i>m/z</i> 167.0841 (red) and IS (peak 3) at <i>m/z</i> 328.0864 (green) in rat brain after 4-hour intravenous constant infusion of <i>R</i> -modafinil (20 mg/kg) compared to total ion chromatogram of a blank rat brain (blue). The concentration of <i>R</i> -modafinil in sample is 471 ng/mL and IS 500 ng/mL. | 7  |
| <b>Table S3.</b> Estimated unbound plasma concentrations ( $C_{u,plasma}$ ) and unbound-drug concentration in brain interstitial fluid ( $C_{u,brain,ISF}$ ) during 4-h intravenous constant infusion of 20 mg/kg of <i>S</i> -CE-123 and <i>R</i> -modafinil.                                                                                                                                                                       | 8  |
| <b>Figure S5.</b> Structural model used for simulation of time concentration profiles of <i>S</i> -CE-123 and <i>R</i> -modafinil.                                                                                                                                                                                                                                                                                                   | 9  |
| <b>Figure S6.</b> Simulated unbound plasma, unbound brain and total plasma concentration-time profiles of <i>S</i> -CE-123 and <i>R</i> -modafinil obtained during 4-h intravenous administration of <i>S</i> -CE-123 and <i>R</i> -modafinil and additional 3 hours post-infusion.                                                                                                                                                  | 9  |
| <b>Figure S7.</b> Relative exposure-time profile reflecting formation of M1, metabolite of <i>S</i> -CE-123 as well as modafinil acid (MA) and modafinil sulfone (MS), metabolites of <i>R</i> -modafinil in plasma during 4-hour intravenous constant infusion of 20 mg/kg of <i>S</i> -CE-123 and <i>R</i> -modafinil (n=3 rats, per compound, mean $\pm$ SD).                                                                     | 10 |
| <b>Table S4.</b> Parameters used in simulation exercise.                                                                                                                                                                                                                                                                                                                                                                             | 11 |
| <b>Table S5.</b> MZmine 3 processing parameters.                                                                                                                                                                                                                                                                                                                                                                                     | 12 |

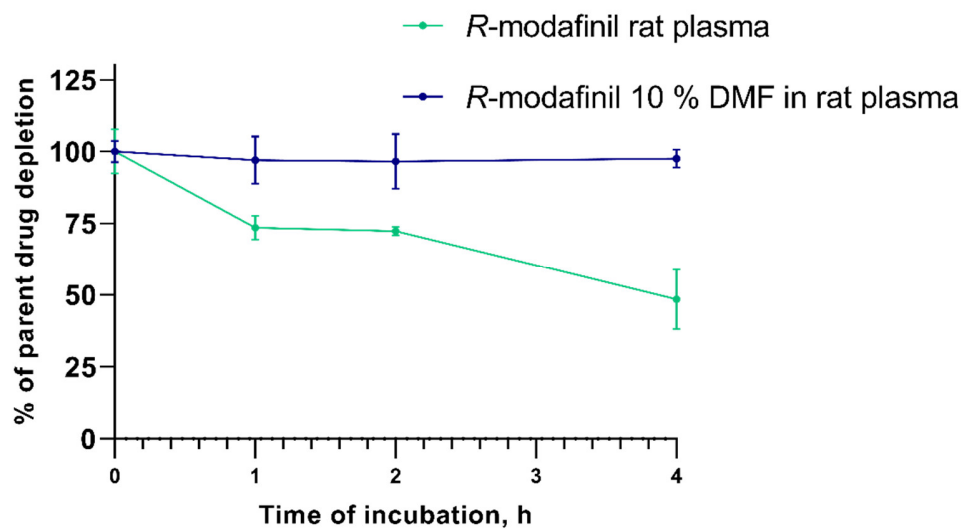

**Figure S1.** Plasma stability of *R*-modafinil after 4-h incubation in rat plasma and rat plasma containing 10 % DMF as an inhibitor (n=3, mean  $\pm$  SD).

**Table S1.** Assessment *R*-modafinil's (50, 500 and 1000 ng/mL) accuracy in presence of modafinic acid (1000 ng/mL) (n=3, mean  $\pm$  SD).

| Level<br>ng/mL | Accuracy<br>RE% [%] |
|----------------|---------------------|
| 1000           | 7.7 $\pm$ 8.7       |
| 500            | -3.4 $\pm$ 7.6      |
| 50             | 9.8 $\pm$ 9.8       |

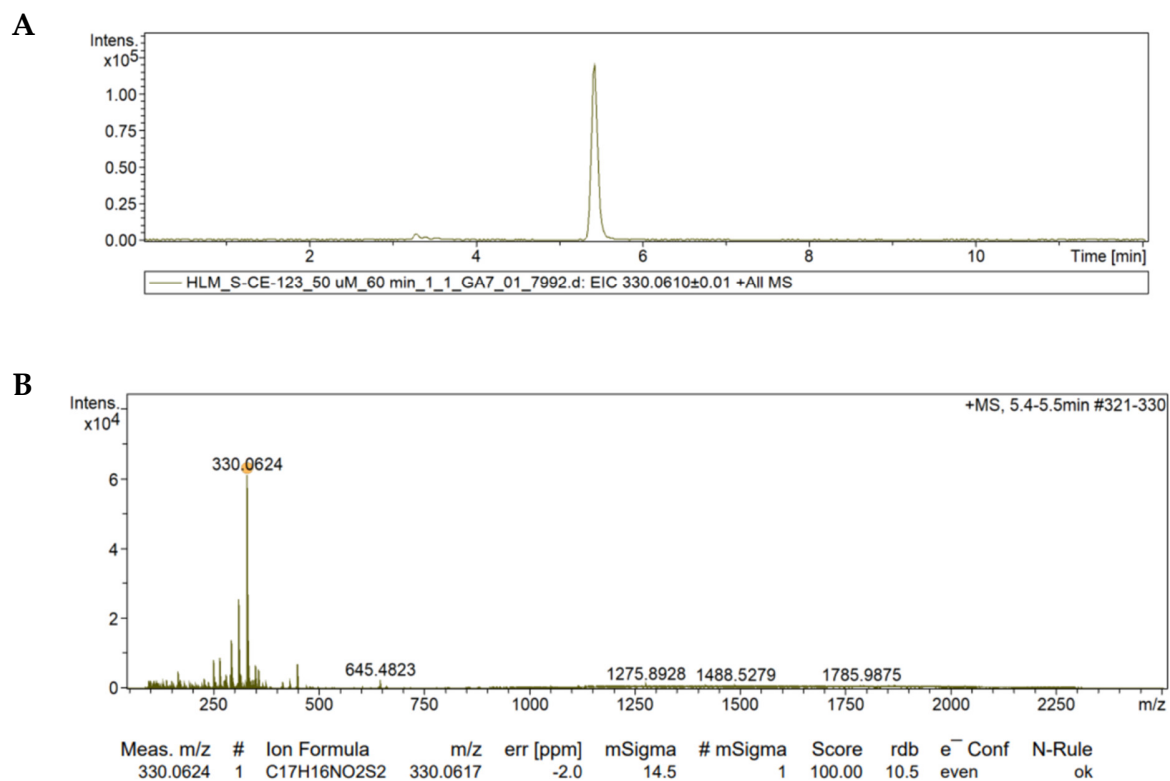

**Figure S2. A:** Extracted ion chromatogram of *S*-CE-123 metabolite M1 at  $m/z$  330.0624 after 60 minutes of incubation of *S*-CE-123 (50  $\mu$ M) with human liver microsomes. **B:** High resolution mass specter of *S*-CE-123 metabolite M1.

**Table S2.** Total concentration of S-CE-123 and R-modafinil in rat plasma, brain, CSF, liver, kidney, and spinal cord 4 hours intravenous constant infusion of 20 mg/kg each (n=3, except CSF n=2 for S-CE-123 and n=1 for R-modafinil).

|                     | S-CE-123<br>(n=3) | R-modafinil<br>(n=3) |
|---------------------|-------------------|----------------------|
| <b>Plasma</b>       |                   |                      |
| <i>Conc., ng/mL</i> | 1052              | 1008                 |
| <i>SD ng/mL</i>     | 561               | 210                  |
| <i>CV %</i>         | 53                | 21                   |
| <b>CSF</b>          |                   |                      |
| <i>Conc., ng/mL</i> | 570* and 104**    | 784                  |
| <i>SD ng/mL</i>     | -                 | -                    |
| <i>CV %</i>         | -                 | -                    |
| <b>Brain</b>        |                   |                      |
| <i>Conc., ng/g</i>  | 820               | 448                  |
| <i>SD ng/g</i>      | 483               | 31                   |
| <i>CV %</i>         | 59                | 7                    |
| <b>Spinal cord</b>  |                   |                      |
| <i>Conc., ng/g</i>  | 1244              | 733                  |
| <i>SD ng/g</i>      | 685               | 72                   |
| <i>CV %</i>         | 55                | 10                   |
| <b>Liver</b>        |                   |                      |
| <i>Conc., ng/g</i>  | 2727              | 2170                 |
| <i>SD ng/g</i>      | 1621              | 724                  |
| <i>CV %</i>         | 59                | 33                   |
| <b>Kidney</b>       |                   |                      |
| <i>Conc., ng/g</i>  | 1785              | 2536                 |
| <i>SD ng/g</i>      | 1047              | 466                  |
| <i>CV %</i>         | 59                | 18                   |

\*Rat 1; \*\*Rat 2

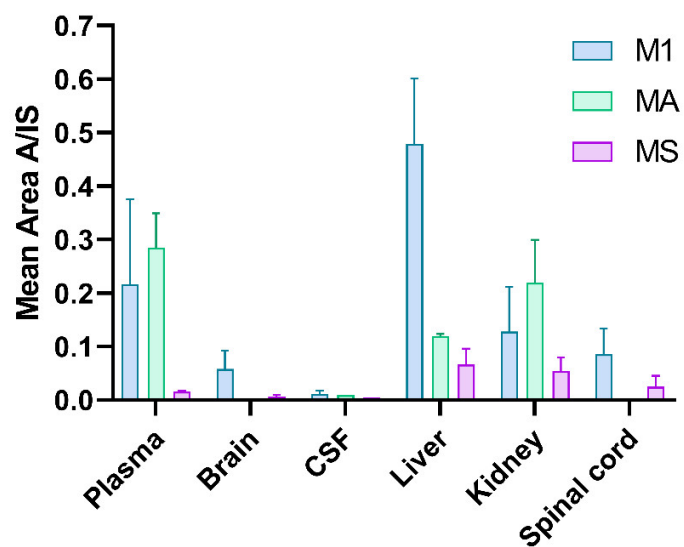

**Figure S3.** Relative exposure of M1, metabolite of *S*-CE-123 and modafinil acid (MA) and modafinil sulfone (MS), metabolites of *R*-modafinil in rat plasma and CSF and vital organs after 4-hour intravenous constant infusion of 20 mg/kg of *S*-CE-123 and *R*-modafinil (n=3, except CSF n=2 for *S*-CE-123 and n=1 for *R*-modafinil, mean  $\pm$  SD)

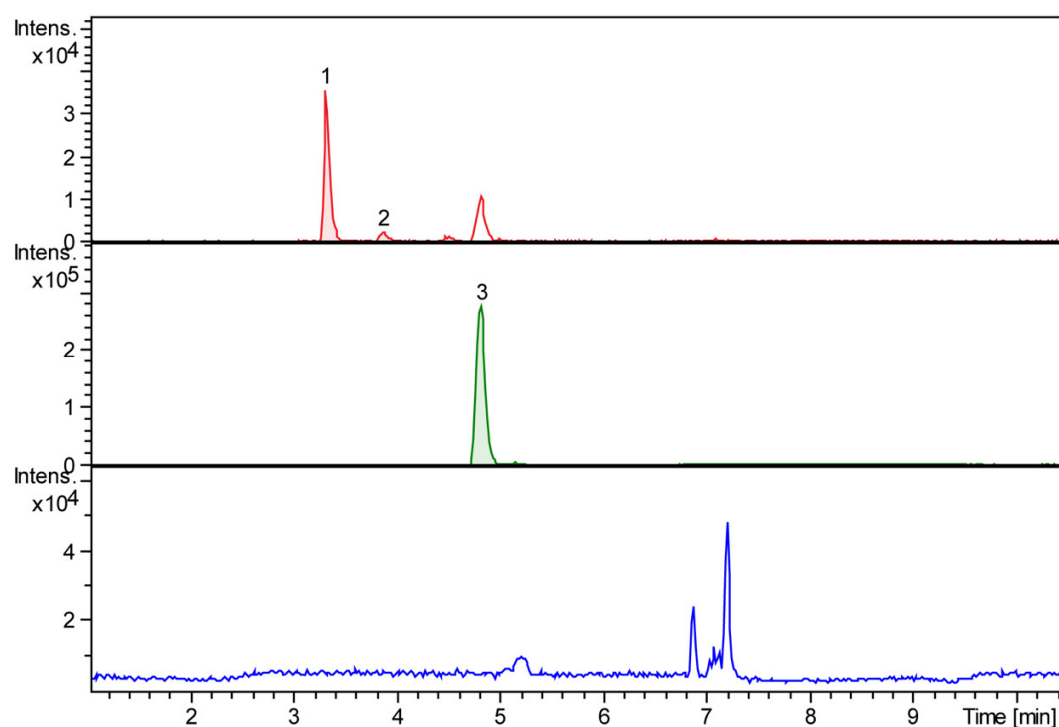

**Figure S4.** Extracted ion chromatograms of *R*-modafinil (peak 1) and modafinil sulfone (peak 2) at  $m/z$  167.0841 (red) and IS (peak 3) at  $m/z$  328.0864 (green) in rat brain after 4-hour intravenous constant infusion of *R*-modafinil (20 mg/kg) compared to total ion chromatogram of a blank rat brain (blue). The concentration of *R*-modafinil in sample is 471 ng/mL and IS 500 ng/mL.

**Table S3.** Estimated unbound plasma concentrations ( $C_{u,plasma}$ ) and unbound-drug concentration in brain interstitial fluid ( $C_{u,brain,ISF}$ ) during 4-h intravenous constant infusion of 20 mg/kg of *S*-CE-123 and *R*-modafinil.

|                     | Parameters                                                               | Value | Unit     |
|---------------------|--------------------------------------------------------------------------|-------|----------|
| <i>S</i> -CE-123    | Fraction unbound in plasma, $f_{u,plasma}$                               | 0.25  | unitless |
|                     | Unbound brain-to-plasma concentration ratio, $K_{p,uu,brain}$            | 0.46  | unitless |
|                     | Total drug concentration in plasma, $C_{tot,plasma}$                     | 3355  | nM       |
|                     | Unbound-drug concentration in plasma, $C_{u,plasma}$                     | 839   | nM       |
|                     | Unbound-drug concentration in brain interstitial fluid, $C_{u,brainISF}$ | 386   | nM       |
|                     | Half-maximal inhibitory concentration, $IC_{50}^a$                       | 4600  | nM       |
|                     | Inhibitory constant, $K_i^b$                                             | 610   | nM       |
| <i>R</i> -modafinil | Fraction unbound in plasma, $f_{u,plasma}$                               | 0.79  | unitless |
|                     | Unbound brain-to-plasma concentration ratio, $K_{p,uu,brain}$            | 0.097 | unitless |
|                     | Total drug concentration in plasma, $C_{tot,plasma}$                     | 3686  | nM       |
|                     | Unbound-drug concentration in plasma, $C_{u,plasma}$                     | 2912  | nM       |
|                     | Unbound-drug concentration in brain interstitial fluid, $C_{u,brainISF}$ | 282   | nM       |
|                     | Half-maximal inhibitory concentration, $IC_{50}^c$                       | 4000  | nM       |
|                     | Inhibitory constant, $K_i^c$                                             | 780   | nM       |

a – Data from Kristofova *et al.* 2018 [36];

b – Data from Lubec *et al.* 2023 [56];

c – Data from Loland *et al.* 2012 [27];



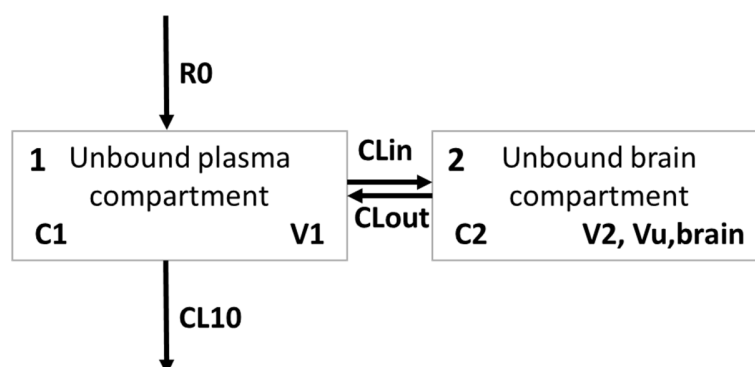

**Figure S5.** Structural model used for simulation of time concentration profiles of *S*-CE-123 and *R*-modafinil.

**Figure S6.** Simulated unbound plasma, unbound brain and total plasma concentration-time profiles of *S*-CE-123 and *R*-modafinil obtained during 4-h intravenous administration of *S*-CE-123 and *R*-modafinil and additional 3 hours post-infusion.

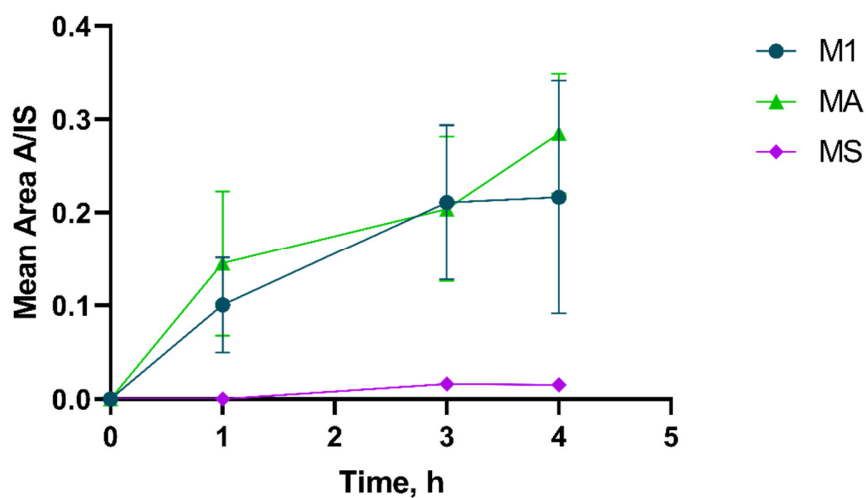

**Figure S7.** Relative exposure-time profile reflecting formation of M1, metabolite of *S*-CE-123 as well as modafinil acid (MA) and modafinil sulfone (MS), metabolites of *R*-modafinil in plasma during 4-hour intravenous constant infusion of 20 mg/kg of *S*-CE-123 and *R*-modafinil (n=3 rats, per compound, mean  $\pm$  SD)

**Table S4.** Parameters used in simulation exercise.

| Parameter                                                    | Unit            | S-CE-123 | R-modafinil |
|--------------------------------------------------------------|-----------------|----------|-------------|
| <b>Systemic parameters</b>                                   |                 |          |             |
| Systemic clearance, $CL$                                     | L/h             | 0.184    | 1.498       |
| Systemic clearance unbound, $Cl_u$                           | L/h             | 0.046    | 1.194       |
| Apparent volume of distribution, $V_d$                       | L               | 0.232    | 1.022       |
| Apparent volume of distribution unbound, $V_d$               | L               | 0.058    | 0.814       |
| Fraction of unbound in plasma, $f_{u,plasma}$                | unitless        | 0.252    | 0.797       |
| <b>Rate of BBB transport parameters*</b>                     |                 |          |             |
| Pe                                                           | cm/min          | 0.0030   | 0.0023      |
| Pe rat**                                                     | mL/min          | 0.545    | 0.422       |
| Clin                                                         | L/h             | 0.033    | 0.025       |
| Clout                                                        | L/h             | 0.071    | 0.261       |
| <b>Extent of BBB transport and intra-brain distribution</b>  |                 |          |             |
| Unbound brain-to-plasma concentration ratio, $K_{p,u,brain}$ | unitless        | 0.46     | 0.097       |
| Unbound volume of distribution in brain, $V_{u,brain}$       | mL/g brain      | 5.21     | 3.73        |
| Unbound volume of distribution in brain, $V_{u,brain}$       | L               | 0.009378 | 0.006714    |
| <b>Additional parameters used</b>                            |                 |          |             |
| Infusion rate                                                | mg/h            | 0.05     | 1.0         |
| Rat weight                                                   | kg              | 0.3      | 0.3         |
| Brain weight                                                 | g               | 1.8      | 1.8         |
| Surface area of BBB                                          | cm <sup>2</sup> | 180      | 180         |
| MW                                                           | Da              | 313.1    | 273.4       |

\* Data of blood-brain barrier permeation of 100  $\mu$ M CE-123 and modafinil across an *in vitro* Transwell model based on mouse cell line cerebEND were included in the simulation. Experimental procedures were published previously [36,40] The permeability coefficients were calculated according to the clearance principle deducting blank inserts without cells.

\*\*Similar apparent permeability in human BBB cell culture model and rat endothelial cells was assumed.

**Table S5.** MZmine 3 processing parameters.

| Parameter                                     | Mass detection | Chromatogram building | <sup>13</sup> C isotope filter | Join aligner  |
|-----------------------------------------------|----------------|-----------------------|--------------------------------|---------------|
| Mass detection                                | Centroid       |                       |                                |               |
| Noise level                                   | 1.00E+03       |                       |                                |               |
| MS level                                      | 1              |                       |                                |               |
| Min consecutive scans                         |                | 5                     |                                |               |
| Min intensity for consecutive scans           |                | 1.00E+04              |                                |               |
| <i>m/z</i> tolerance                          |                | 0.001 (5 ppm)         | 0.001 (5 ppm)                  | 0.001 (5 ppm) |
| Chromatographic threshold (%)                 |                |                       |                                |               |
| Search minimum in RT <sup>a</sup> range (min) |                |                       |                                |               |
| Minimum relative height (%)                   |                |                       |                                |               |
| Min ratio of peak top/edge                    |                |                       |                                |               |
| Peak duration range (min)                     |                |                       |                                |               |
| RT tolerance (absolute, min)                  |                |                       | 0.01                           |               |
| Maximum charge                                |                |                       | 1                              |               |
| Representative isotope                        |                |                       | lowest <i>m/z</i>              |               |
| Weight for <i>m/z</i>                         |                |                       |                                | 10            |
| RT tolerance (relative, %)                    |                |                       |                                | 5             |
| Weight for RT                                 |                |                       |                                | 5             |

*a* – RT refers to retention time
